# Supplementary material
Source: PubMed Central journal article supplement (PMC9381140)
Supplement: NIHMS1829845-supplement-Supplementary_Information.pdf [file NIHMS1829845-supplement-Supplementary_Information.pdf]

# Supplementary Information

## **On-tissue amidation of sialic acid with aniline for sensitive imaging of sialylated N-glycans from FFPE tissue sections via MALDI mass spectrometry**

Hua Zhang<sup>1</sup>, Xudong Shi<sup>2</sup>, Yuan Liu<sup>1</sup>, Bin Wang<sup>1</sup>, Meng Xu<sup>3</sup>, Nathan V. Welham<sup>2</sup>, and Lingjun Li<sup>1, 3\*</sup>

<sup>1</sup>School of Pharmacy, University of Wisconsin-Madison, Madison, Wisconsin 53705, United States

<sup>2</sup>Division of Otolaryngology, Department of Surgery, School of Medicine and Public Health, University of Wisconsin-Madison, Madison, Wisconsin 53792, United States

<sup>3</sup>Department of Chemistry, University of Wisconsin-Madison, Madison, Wisconsin 53705, United States

**Corresponding author:** Lingjun Li  
**Post address:** 777 Highland Ave, Madison, Wisconsin, United States  
**ZIP Code:** 53705  
**Email:** lingjun.li@wisc.edu  
**Tel:** +1 608-265-8491  
**Fax:** +1 608-262-5345

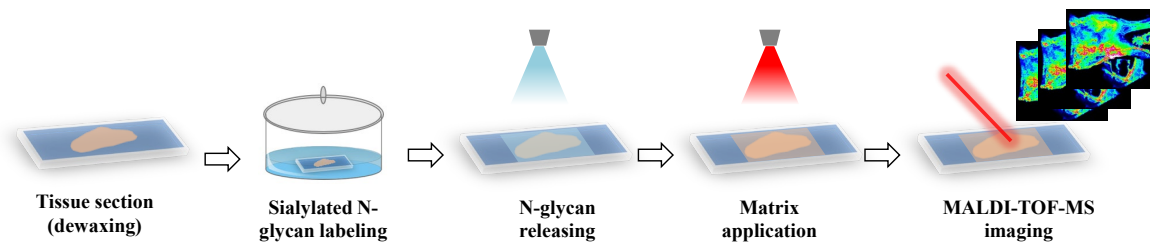

**Figure S1 Schematic diagram of the on-tissue labeling of sialylated N-glycans using aniline for MALDI-MS imaging.**

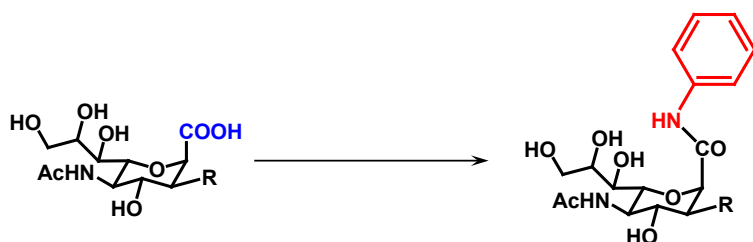

**Scheme S1. The chemical reaction of labeling the sialic acid residue of sialylated N-glycan with aniline.**

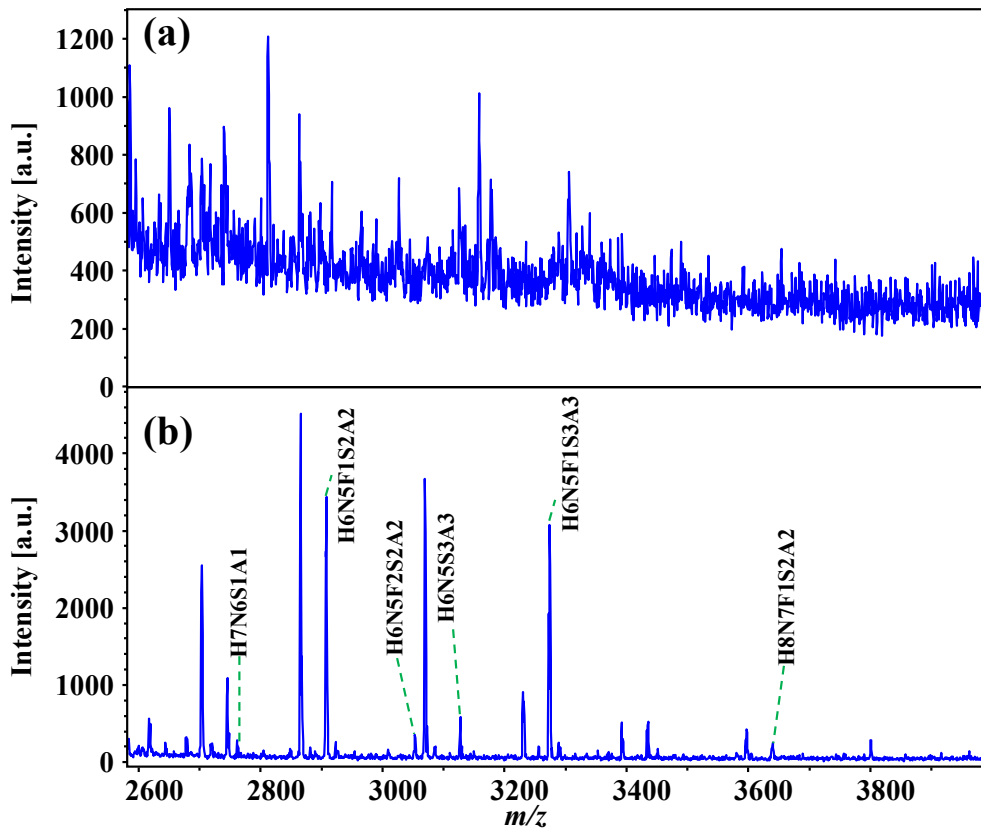

**Figure S2. Zoomed-in mass spectra of BTG glycoprotein over a mass range of 2600-4000 Da:** (a) sample without derivatization, (b) sample with aniline amidation derivatization. N-glycan units include Hexose (H), HexNAc (N), Fucose (F), Sialic acid (S), tagged aniline (A).

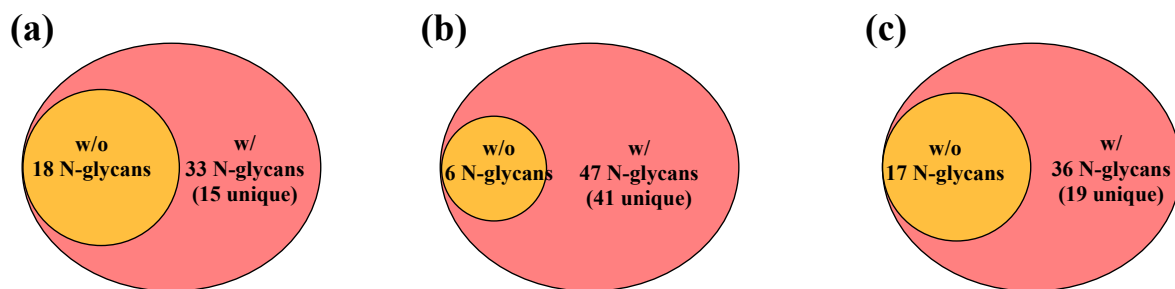

**Figure S3. Venn diagrams presenting the numbers of N-glycans detected in the analysis of glycoproteins and tissue section:** (a) analysis of bovine thyroglobulin protein without (w/o) and with (w/) aniline amidation derivatization, (b) analysis of fetuin protein without (w/o) and with (w/) aniline amidation derivatization, (c) N-glycans detected from one specific region of the human laryngeal tissue without (w/o) and with (w/) chemical derivatization.

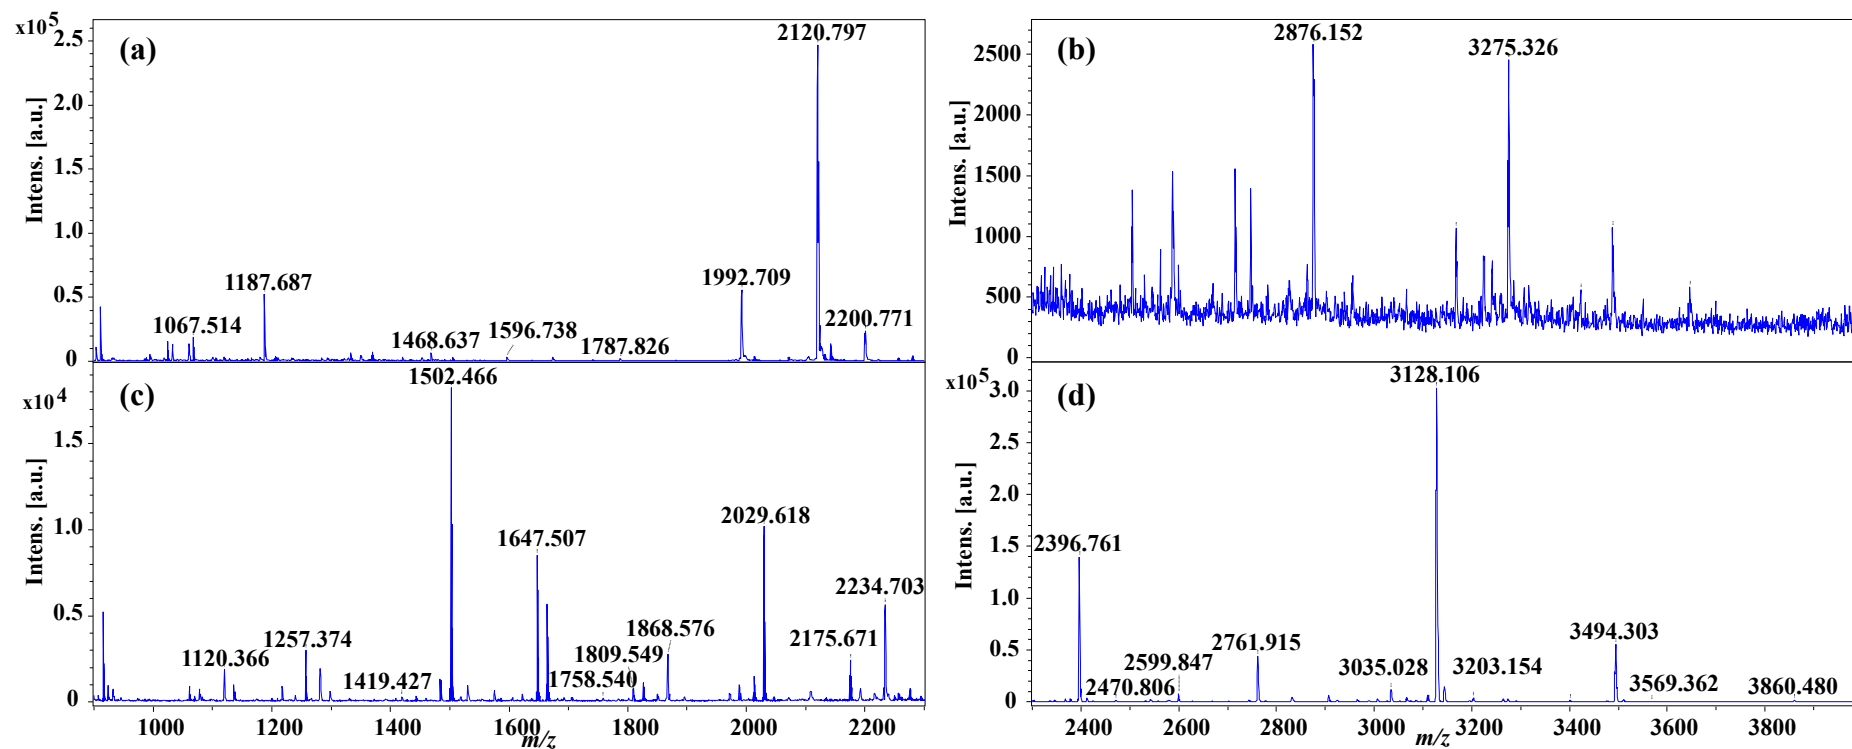

**Figure S4. Zoomed-in mass spectra of fetuin glycoprotein: (a) over a mass range of 900-2300 Da for sample without derivatization, (b) over a mass range of 2300-4000 Da for sample without derivatization, (c) over a mass range of 900-2300 Da for sample with aniline amidation derivatization, (d) over a mass range of 2300-4000 Da for sample with aniline amidation derivatization.**

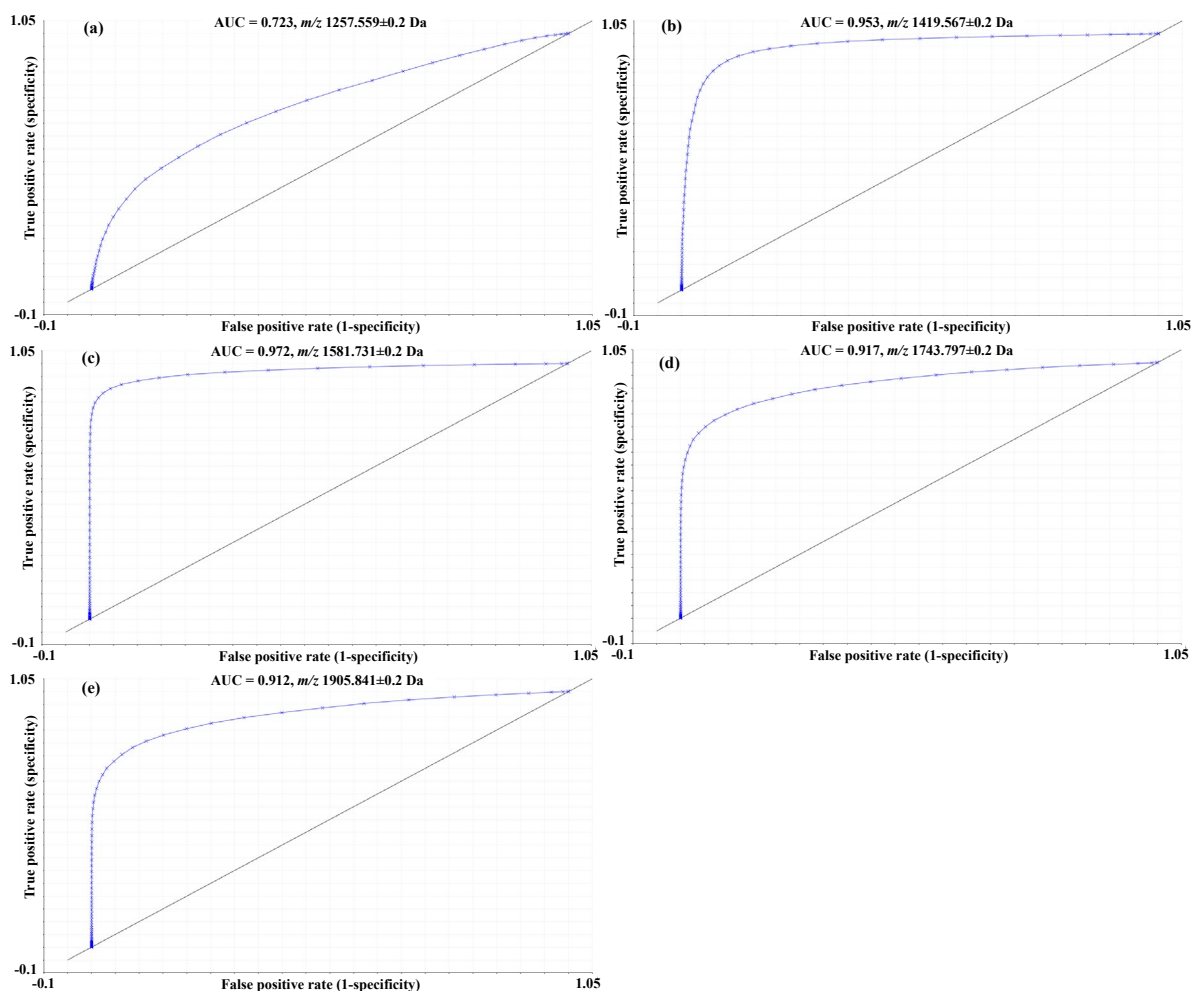

**Figure S5. ROC curves of cancer region plotted against normal region of the laryngeal tissue sample at ion intensities of N-glycans of (a) Hex<sub>5</sub>HexNAc<sub>2</sub> at  $m/z$  1257.559, (b) Hex<sub>6</sub>HexNAc<sub>2</sub> at  $m/z$  1419.567, (c) Hex<sub>7</sub>HexNAc<sub>2</sub> at  $m/z$  1581.731, (d) Hex<sub>8</sub>HexNAc<sub>2</sub> at  $m/z$  1743.797, (e) Hex<sub>9</sub>HexNAc<sub>2</sub> at  $m/z$  1905.841.**

**Table S1. N-glycans detected from BTG glycoprotein using MALDI-TOF-MS without aniline labeling**

| No | Experimental mass | Signal-to-noise (SN) | Identified N-glycans <sup>a</sup> | Theoretical adduct mass <sup>b</sup> |
|----|-------------------|----------------------|-----------------------------------|--------------------------------------|
| 1  | 1257.322          | 145.7                | Hex5HexNAc2                       | 1257.423                             |
| 2  | 1282.363          | 13.3                 | Hex3HexNAc3dHex1                  | 1282.455                             |
| 3  | 1419.361          | 41.6                 | Hex6HexNAc2                       | 1419.476                             |
| 4  | 1444.394          | 24.9                 | Hex4HexNAc3dHex1                  | 1444.508                             |
| 5  | 1581.399          | 70.8                 | Hex7HexNAc2                       | 1581.529                             |
| 6  | 1647.452          | 10.7                 | Hex4HexNAc4dHex1                  | 1647.587                             |
| 7  | 1663.454          | 6.4                  | Hex5HexNAc4                       | 1663.582                             |
| 8  | 1743.442          | 103.0                | Hex8HexNAc2                       | 1743.582                             |
| 9  | 1751.700          | 18.9                 | Hex5HexNAc3NeuAc1                 | 1751.598                             |
| 10 | 1809.506          | 69.2                 | Hex5HexNAc4dHex1                  | 1809.640                             |
| 11 | 1825.474          | 6.5                  | Hex6HexNAc4                       | 1825.635                             |
| 12 | 1905.479          | 202.5                | Hex9HexNAc2                       | 1905.634                             |
| 13 | 1971.547          | 71.8                 | Hex6HexNAc4dHex1                  | 1971.693                             |
| 14 | 2012.556          | 3.5                  | Hex5HexNAc5dHex1                  | 2012.719                             |
| 15 | 2262.577          | 7.3                  | Hex6HexNAc4NeuAc1dHex1            | 2262.788                             |
| 16 | 2336.655          | 8.8                  | Hex7HexNAc5dHex1                  | 2336.825                             |
| 17 | 2450.151          | 17.3                 | Hex5HexNAc5NeuAc1dHex2            | 2449.873                             |
| 18 | 2500.729          | 7.5                  | Hex3HexNAc9dHex1                  | 2500.931                             |

<sup>a</sup> Hex, hexose (galactose, mannose); HexNAc, HexNAC, N-acetylhexosamine; NeuAc, N-acetyl neuraminic acid; dHex, fucose

<sup>b</sup> Theoretical adduct *m/z* refers to databases of GlycoWorkbench (<https://code.google.com/archive/p/glycoworkbench/>)

**Table S2. N-glycans detected from BTG glycoprotein using MALDI-TOF-MS with aniline labeling**

| No | Experimental mass | Signal-to-noise (SN) | Identified N-glycans <sup>a</sup> | Theoretical adduct mass <sup>b</sup> |
|----|-------------------|----------------------|-----------------------------------|--------------------------------------|
| 1  | 1257.331          | 27.0                 | Hex5HexNAc2                       | 1257.423                             |
| 2  | 1282.361          | 28.1                 | Hex3HexNAc3dHex1                  | 1282.455                             |
| 3  | 1419.374          | 10.7                 | Hex6HexNAc2                       | 1419.476                             |
| 4  | 1444.398          | 28.1                 | Hex4HexNAc3dHex1                  | 1444.508                             |
| 5  | 1581.411          | 20.5                 | Hex7HexNAc2                       | 1581.529                             |

|    |          |        |                        |          |
|----|----------|--------|------------------------|----------|
| 6  | 1647.452 | 17.2   | Hex4HexNAc4dHex1       | 1647.587 |
| 7  | 1663.452 | 3.9    | Hex5HexNAc4            | 1663.582 |
| 8  | 1743.446 | 53.6   | Hex8HexNAc2            | 1743.582 |
| 9  | 1809.495 | 15.9   | Hex5HexNAc4dHex1       | 1809.640 |
| 10 | 1825.506 | 3.5    | Hex6HexNAc4            | 1825.635 |
| 11 | 1826.495 | 12.7   | Hex5HexNAc3NeuAc1      | 1826.645 |
| 12 | 1867.522 | 6.2    | Hex4HexNAc4NeuAc1      | 1867.672 |
| 13 | 1905.491 | 175.3  | Hex9HexNAc2            | 1905.634 |
| 14 | 1971.532 | 35.6   | Hex6HexNAc4dHex1       | 1971.693 |
| 15 | 1988.536 | 7.6    | Hex6HexNAc3NeuAc1      | 1988.698 |
| 16 | 2012.551 | 3.6    | Hex5HexNAc5dHex1       | 2012.719 |
| 17 | 2030.565 | 8.1    | Hex4HexNAc3NeuAc2      | 2030.735 |
| 18 | 2134.585 | 7.9    | Hex6HexNAc3NeuAc1dHex1 | 2134.756 |
| 19 | 2174.595 | 18.3   | Hex6HexNAc5dHex1       | 2174.772 |
| 20 | 2336.655 | 15.1   | Hex7HexNAc5dHex1       | 2336.825 |
| 21 | 2337.669 | 767.8  | Hex6HexNAc4NeuAc1dHex1 | 2337.835 |
| 22 | 2393.694 | 4.0    | Hex7HexNAc6            | 2393.846 |
| 23 | 2394.674 | 6.2    | Hex6HexNAc5NeuAc1      | 2394.857 |
| 24 | 2500.733 | 9.5    | Hex3HexNAc9dHex1       | 2500.931 |
| 25 | 2524.751 | 26.9   | Hex5HexNAc5NeuAc1dHex2 | 2524.920 |
| 26 | 2541.764 | 1249.6 | Hex5HexNAc4NeuAc2dHex1 | 2541.925 |
| 27 | 2556.740 | 6.4    | Hex7HexNAc5NeuAc1      | 2556.910 |
| 28 | 2760.861 | 7.4    | Hex7HexNAc6NeuAc1      | 2759.989 |
| 29 | 2906.919 | 77.1   | Hex6HexNAc5NeuAc2dHex1 | 2907.057 |
| 30 | 3053.979 | 9.1    | Hex6HexNAc5NeuAc2dHex2 | 3053.115 |
| 31 | 3127.021 | 10.4   | Hex6HexNAc5NeuAc3      | 3127.142 |
| 32 | 3273.101 | 61.6   | Hex6HexNAc5NeuAc3dHex1 | 3273.200 |
| 33 | 3638.289 | 6.2    | Hex8HexNAc7NeuAc2dHex1 | 3637.322 |

<sup>a</sup> Hex, hexose (galactose, mannose); HexNAc, HexNAC, N-acetylhexosamine; NeuAc, N-acetyl neuraminic acid; dHex, fucose

<sup>b</sup> Theoretical adduct *m/z* refers to databases of GlycoWorkbench (<https://code.google.com/archive/p/glycoworkbench/>)

**Table S3. N-glycans detected from fetuin glycoprotein using MALDI-TOF-MS without aniline labeling**

| No | Experimental mass | Signal-to-noise (SN) | Identified N-glycans <sup>a</sup> | Theoretical adduct mass <sup>b</sup> |
|----|-------------------|----------------------|-----------------------------------|--------------------------------------|
| 1  | 933.399           | 6.5                  | Hex3HexNAc2                       | 933.318                              |



|   |          |      |                        |          |
|---|----------|------|------------------------|----------|
| 2 | 1079.511 | 3.4  | Hex3HexNAc2dHex1       | 1079.375 |
| 3 | 1420.616 | 12.0 | Hex6HexNAc2            | 1419.476 |
| 4 | 2012.601 | 6.2  | Hex5HexNAc5dHex1       | 2012.719 |
| 5 | 2141.785 | 56.3 | Hex4HexNAc5NeuAc1dHex1 | 2141.762 |
| 6 | 2256.809 | 12.8 | Hex4HexNAc7dHex1       | 2256.825 |

<sup>a</sup> Hex, hexose (galactose, mannose); HexNAc, HexNAC, N-acetylhexosamine; NeuAc, N-acetylneuraminic acid; dHex, fucose

<sup>b</sup> Theoretical adduct *m/z* refers to databases of GlycoWorkbench (<https://code.google.com/archive/p/glycoworkbench/>)

**Table S4. N-glycans detected from fetuin glycoprotein using MALDI-TOF-MS with aniline labeling**

| No | Experimental mass | Signal-to-noise (SN) | Identified N-glycans <sup>a</sup> | Theoretical adduct mass <sup>b</sup> |
|----|-------------------|----------------------|-----------------------------------|--------------------------------------|
| 1  | 933.294           | 8.2                  | Hex3HexNAc2                       | 933.318                              |
| 2  | 1079.330          | 10.3                 | Hex3HexNAc2dHex1                  | 1079.375                             |
| 3  | 1136.358          | 23.0                 | Hex3HexNAc3                       | 1136.397                             |
| 4  | 1257.374          | 71.0                 | Hex5HexNAc2                       | 1257.423                             |
| 5  | 1282.401          | 33.6                 | Hex3HexNAc3dHex1                  | 1282.455                             |
| 6  | 1298.395          | 14.9                 | Hex4HexNAc3                       | 1298.450                             |
| 7  | 1419.427          | 7.1                  | Hex6HexNAc2                       | 1419.476                             |
| 8  | 1444.445          | 5.9                  | Hex4HexNAc3dHex1                  | 1444.508                             |
| 9  | 1485.466          | 27.8                 | Hex3HexNAc4dHex1                  | 1485.534                             |
| 10 | 1502.466          | 412.4                | Hex3HexNAc3NeuAc1                 | 1502.540                             |
| 11 | 1622.476          | 9.7                  | Hex6HexNAc3                       | 1622.555                             |
| 12 | 1648.509          | 139.2                | Hex3HexNAc3NeuAc1dHex1            | 1648.598                             |
| 13 | 1664.503          | 121.8                | Hex4HexNAc3NeuAc1                 | 1664.592                             |
| 14 | 1809.548          | 14.5                 | Hex5HexNAc4dHex1                  | 1809.640                             |
| 15 | 1810.549          | 15.5                 | Hex4HexNAc3NeuAc1dHex1            | 1810.650                             |
| 16 | 1826.549          | 21.8                 | Hex5HexNAc3NeuAc1                 | 1826.645                             |
| 17 | 1850.563          | 9.3                  | Hex4HexNAc5dHex1                  | 1850.666                             |
| 18 | 1867.570          | 53.5                 | Hex4HexNAc4NeuAc1                 | 1867.672                             |
| 19 | 1972.595          | 7.5                  | Hex5HexNAc3NeuAc1dHex1            | 1972.703                             |
| 20 | 1988.598          | 18.3                 | Hex6HexNAc3NeuAc1                 | 1988.698                             |
| 21 | 2012.622          | 9.5                  | Hex5HexNAc5dHex1                  | 2012.719                             |
| 22 | 2029.618          | 185.5                | Hex5HexNAc4NeuAc1                 | 2029.725                             |
| 23 | 2175.671          | 40.3                 | Hex5HexNAc4NeuAc1dHex1            | 2175.783                             |
| 24 | 2192.668          | 12.5                 | Hex5HexNAc3NeuAc2                 | 2192.788                             |

|    |          |        |                        |          |
|----|----------|--------|------------------------|----------|
| 25 | 2216.681 | 7.6    | Hex4HexNAc5NeuAc1dHex1 | 2216.809 |
| 26 | 2232.686 | 13.5   | Hex5HexNAc5NeuAc1      | 2232.804 |
| 27 | 2256.680 | 7.8    | Hex4HexNAc7dHex1       | 2256.825 |
| 28 | 2304.701 | 12.9   | Hex5HexNAc5dHex3       | 2304.835 |
| 29 | 2336.728 | 8.6    | Hex7HexNAc5dHex1       | 2336.825 |
| 30 | 2337.724 | 12.9   | Hex6HexNAc4NeuAc1dHex1 | 2337.835 |
| 31 | 2395.759 | 1891.7 | Hex5HexNAc4NeuAc2      | 2395.867 |
| 32 | 2541.821 | 36.4   | Hex5HexNAc4NeuAc2dHex1 | 2541.925 |
| 33 | 2557.815 | 9.4    | Hex6HexNAc4NeuAc2      | 2557.920 |
| 34 | 2598.843 | 65.8   | Hex5HexNAc5NeuAc2      | 2598.947 |
| 35 | 2743.902 | 16.9   | Hex6HexNAc6NeuAc1dHex1 | 2743.994 |
| 36 | 2759.899 | 16.6   | Hex7HexNAc6NeuAc1      | 2759.989 |
| 37 | 2907.983 | 94.3   | Hex5HexNAc4NeuAc3dHex1 | 2908.068 |
| 38 | 3053.044 | 12.6   | Hex6HexNAc5NeuAc2dHex2 | 3053.115 |
| 39 | 3110.086 | 100.7  | Hex6HexNAc6NeuAc2dHex1 | 3110.137 |
| 40 | 3127.102 | 3198.0 | Hex6HexNAc5NeuAc3      | 3127.142 |
| 41 | 3264.138 | 43.3   | Hex4HexNAc8NeuAc1dHex4 | 3264.221 |
| 42 | 3273.175 | 33.1   | Hex6HexNAc5NeuAc3dHex1 | 3273.200 |
| 43 | 3289.177 | 7.7    | Hex7HexNAc5NeuAc3      | 3289.195 |
| 44 | 3331.222 | 4.7    | Hex5HexNAc5NeuAc4      | 3331.232 |
| 45 | 3476.285 | 14.0   | Hex6HexNAc6NeuAc3dHex1 | 3476.280 |
| 46 | 3493.297 | 528.9  | Hex6HexNAc5NeuAc4      | 3493.285 |
| 47 | 3858.487 | 7.3    | Hex7HexNAc6NeuAc4      | 3858.417 |

<sup>a</sup> Hex, hexose (galactose, mannose); HexNAc, HexNAC, N-acetylhexosamine; NeuAc, N-acetyl neuraminic acid; dHex, fucose

<sup>b</sup> Theoretical adduct *m/z* refers to databases of GlycoWorkbench (<https://code.google.com/archive/p/glycoworkbench/>)

**Table S5. N-glycans detected from tissue sample using MALDI-TOF-MS without aniline labeling**

| No | Experimental mass | Signal-to-noise (SN) | Identified N-glycans <sup>a</sup> | Theoretical adduct mass <sup>b</sup> |
|----|-------------------|----------------------|-----------------------------------|--------------------------------------|
| 1  | 1079.103          | 13.8                 | Hex3HexNAc2dHex1                  | 1079.375                             |
| 2  | 1257.391          | 115.9                | Hex5HexNAc2                       | 1257.423                             |
| 3  | 1419.446          | 375.7                | Hex6HexNAc2                       | 1419.476                             |
| 4  | 1485.488          | 8.4                  | Hex3HexNAc4dHex1                  | 1485.534                             |
| 5  | 1581.487          | 83.5                 | Hex7HexNAc2                       | 1581.529                             |
| 6  | 1647.529          | 15.5                 | Hex4HexNAc4dHex1                  | 1647.587                             |

|    |          |      |                        |          |
|----|----------|------|------------------------|----------|
| 7  | 1663.532 | 7.4  | Hex5HexNAc4            | 1663.582 |
| 8  | 1688.552 | 4.7  | Hex3HexNAc5dHex1       | 1688.614 |
| 9  | 1704.543 | 4.3  | Hex4HexNAc5            | 1704.609 |
| 10 | 1743.525 | 59.6 | Hex8HexNAc2            | 1743.582 |
| 11 | 1809.569 | 62.5 | Hex5HexNAc4dHex1       | 1809.640 |
| 12 | 1850.580 | 37.3 | Hex4HexNAc5dHex1       | 1850.666 |
| 13 | 1905.675 | 12.5 | Hex9HexNAc2            | 1905.634 |
| 14 | 1996.627 | 63.2 | Hex4HexNAc5dHex2       | 1996.724 |
| 15 | 2012.792 | 5.1  | Hex5HexNAc5dHex1       | 2012.719 |
| 16 | 2028.712 | 4.3  | Hex6HexNAc5            | 2028.714 |
| 17 | 2141.609 | 3.1  | Hex4HexNAc5NeuAc1dHex1 | 2141.762 |

<sup>a</sup> Hex, hexose (galactose, mannose); HexNAc, HexNAC, N-acetylhexosamine; NeuAc, N-acetyl neuraminic acid; dHex, fucose

<sup>b</sup> Theoretical adduct *m/z* refers to databases of GlycoWorkbench (<https://code.google.com/archive/p/glycoworkbench/>)

**Table S6. N-glycans detected from tissue sample using MALDI-TOF-MS with aniline**

**labeling**

| No | Experimental mass | Signal-to-noise (SN) | Identified N-glycans <sup>a</sup> | Theoretical adduct mass <sup>b</sup> |
|----|-------------------|----------------------|-----------------------------------|--------------------------------------|
| 1  | 1079.122          | 13.6                 | Hex3HexNAc2dHex1                  | 1079.375                             |
| 2  | 1257.423          | 37.8                 | Hex5HexNAc2                       | 1257.423                             |
| 3  | 1419.444          | 98.1                 | Hex6HexNAc2                       | 1419.476                             |
| 4  | 1444.488          | 4.1                  | Hex4HexNAc3dHex1                  | 1444.508                             |
| 5  | 1445.466          | 6.3                  | Hex3HexNAc2NeuAc1dHex1            | 1445.518                             |
| 6  | 1485.484          | 6.5                  | Hex3HexNAc4dHex1                  | 1485.534                             |
| 7  | 1501.671          | 5.6                  | Hex4HexNAc4                       | 1501.529                             |
| 8  | 1581.482          | 26.1                 | Hex7HexNAc2                       | 1581.529                             |
| 9  | 1622.514          | 4.3                  | Hex6HexNAc3                       | 1622.555                             |
| 10 | 1647.534          | 15.6                 | Hex4HexNAc4dHex1                  | 1647.587                             |
| 11 | 1648.531          | 9.3                  | Hex3HexNAc3NeuAc1dHex1            | 1648.598                             |
| 12 | 1663.524          | 6.0                  | Hex5HexNAc4                       | 1663.582                             |
| 13 | 1664.543          | 6.3                  | Hex4HexNAc3NeuAc1                 | 1664.592                             |
| 14 | 1688.563          | 5.1                  | Hex3HexNAc5dHex1                  | 1688.614                             |
| 15 | 1704.541          | 4.7                  | Hex4HexNAc5                       | 1704.609                             |
| 16 | 1743.514          | 16.3                 | Hex8HexNAc2                       | 1743.582                             |
| 17 | 1809.574          | 26.5                 | Hex5HexNAc4dHex1                  | 1809.640                             |
| 18 | 1850.586          | 14.5                 | Hex4HexNAc5dHex1                  | 1850.666                             |

|    |          |      |                        |          |
|----|----------|------|------------------------|----------|
| 19 | 1867.577 | 3.5  | Hex4HexNAc4NeuAc1      | 1867.672 |
| 20 | 1905.569 | 3.8  | Hex9HexNAc2            | 1905.634 |
| 21 | 1955.604 | 4.3  | Hex5HexNAc4dHex2       | 1955.698 |
| 22 | 1996.644 | 19.5 | Hex4HexNAc5dHex2       | 1996.724 |
| 23 | 2012.612 | 5.1  | Hex5HexNAc5dHex1       | 2012.719 |
| 24 | 2013.622 | 7.2  | Hex4HexNAc4NeuAc1dHex1 | 2013.730 |
| 25 | 2028.642 | 3.6  | Hex6HexNAc5            | 2028.714 |
| 26 | 2029.635 | 5.2  | Hex5HexNAc4NeuAc1      | 2029.725 |
| 27 | 2175.673 | 40.3 | Hex5HexNAc4NeuAc1dHex1 | 2175.783 |
| 28 | 2216.684 | 13.5 | Hex4HexNAc5NeuAc1dHex1 | 2216.809 |
| 29 | 2378.737 | 3.5  | Hex5HexNAc5NeuAc1dHex1 | 2378.862 |
| 30 | 2395.728 | 9.7  | Hex5HexNAc4NeuAc2      | 2395.867 |
| 31 | 2541.795 | 24.9 | Hex5HexNAc4NeuAc2dHex1 | 2541.925 |
| 32 | 2581.802 | 4.0  | Hex5HexNAc6NeuAc1dHex1 | 2581.941 |
| 33 | 2761.195 | 3.1  | Hex6HexNAc5NeuAc2      | 2761.000 |
| 34 | 2907.933 | 25.4 | Hex5HexNAc4NeuAc3dHex1 | 2908.068 |
| 35 | 3272.135 | 5.6  | Hex7HexNAc6NeuAc2dHex1 | 3272.190 |
| 36 | 3273.128 | 11.4 | Hex6HexNAc5NeuAc3dHex1 | 3273.200 |

<sup>a</sup> Hex, hexose (galactose, mannose); HexNAc, HexNAC, N-acetylhexosamine; NeuAc, N-acetyl neuraminic acid; dHex, fucose

<sup>b</sup> Theoretical adduct *m/z* refers to databases of GlycoWorkbench (<https://code.google.com/archive/p/glycoworkbench/>)
